# Supplementary material
Source: publisher site journal article supplement (http://edge.sagepub.com/sites/default/files/Venkataraman%20Chapter%20Outline%2003%20Supplement_0.docx)
Supplement: Supplementary file 1 [file Venkataraman%20Chapter%20Outline%2003%20Supplement_0.docx]

Chapter Outline

# Chapter 3 Supplement: Project Management

***See pages: 96-113.***

Operations Profile: Fast Tracking Manchester’s New Airport Development

Determining the Probability of a Project Being Completed on Time

Calculating the Time−Cost Trade-Offs of Crashing a Project

Calculating a Project’s Earned Value

Terminology for the EVM method

Creating Project Baselines

Why Use Earned Value?

Steps in the Earned Value Management Method

Supplement Summary

Key Terms

Discussion and Review Questions

Solved Problems

Problems
